# Supplementary material for: Structure of a human intramembrane ceramidase explains enzymatic dysfunction found in leukodystrophy
Source: PubMed Central journal article supplement (PMC6303388; doi:10.1038/s41467-018-07864-w), 2018-12-21
Supplement: 41467_2018_7864_MOESM3_ESM.pdf [file 41467_2018_7864_MOESM3_ESM.pdf]

## Reporting Summary

Nature Research wishes to improve the reproducibility of the work that we publish. This form provides structure for consistency and transparency in reporting. For further information on Nature Research policies, see [Authors & Referees](#) and the [Editorial Policy Checklist](#).

### Statistical parameters

When statistical analyses are reported, confirm that the following items are present in the relevant location (e.g. figure legend, table legend, main text, or Methods section).

n/a | Confirmed

- The exact sample size ( $n$ ) for each experimental group/condition, given as a discrete number and unit of measurement
- An indication of whether measurements were taken from distinct samples or whether the same sample was measured repeatedly
- The statistical test(s) used AND whether they are one- or two-sided  
*Only common tests should be described solely by name; describe more complex techniques in the Methods section.*
- A description of all covariates tested
- A description of any assumptions or corrections, such as tests of normality and adjustment for multiple comparisons
- A full description of the statistics including central tendency (e.g. means) or other basic estimates (e.g. regression coefficient) AND variation (e.g. standard deviation) or associated estimates of uncertainty (e.g. confidence intervals)
- For null hypothesis testing, the test statistic (e.g.  $F$ ,  $t$ ,  $r$ ) with confidence intervals, effect sizes, degrees of freedom and  $P$  value noted  
*Give  $P$  values as exact values whenever suitable.*
- For Bayesian analysis, information on the choice of priors and Markov chain Monte Carlo settings
- For hierarchical and complex designs, identification of the appropriate level for tests and full reporting of outcomes
- Estimates of effect sizes (e.g. Cohen's  $d$ , Pearson's  $r$ ), indicating how they were calculated
- Clearly defined error bars  
*State explicitly what error bars represent (e.g. SD, SE, CI)*

*Our web collection on [statistics for biologists](#) may be useful.*

### Software and code

Policy information about [availability of computer code](#)

Data collection

Data refinement and analysis software used in this study are compiled and supported by the SBGrid Consortium, except for the Data collection Da+ software suite being developed by the beamline at the SLS. Also, an automated software suite for serial synchrotron crystallographic data selection and merging procedure was developed at the SLS beamline (unpublished).

Data analysis

Data refinement and analysis software used in this study are compiled and supported by the SBGrid Consortium

For manuscripts utilizing custom algorithms or software that are central to the research but not yet described in published literature, software must be made available to editors/reviewers upon request. We strongly encourage code deposition in a community repository (e.g. GitHub). See the Nature Research [guidelines for submitting code & software](#) for further information.

## Data

Policy information about [availability of data](#)

All manuscripts must include a [data availability statement](#). This statement should provide the following information, where applicable:

- Accession codes, unique identifiers, or web links for publicly available datasets
- A list of figures that have associated raw data
- A description of any restrictions on data availability

Coordinates and structure factors for the structure that support the findings of this study have been deposited in the Protein Data Bank under accession number 6G70. The authors declare that all other data supporting the findings of this study are available within the paper and its supplementary information files.

## Field-specific reporting

Please select the best fit for your research. If you are not sure, read the appropriate sections before making your selection.

Life sciences  Behavioural & social sciences  Ecological, evolutionary & environmental sciences

For a reference copy of the document with all sections, see [nature.com/authors/policies/ReportingSummary-flat.pdf](https://www.nature.com/authors/policies/ReportingSummary-flat.pdf)

## Life sciences study design

All studies must disclose on these points even when the disclosure is negative.

|                 |                                                                                                                                                                                                                                                            |
|-----------------|------------------------------------------------------------------------------------------------------------------------------------------------------------------------------------------------------------------------------------------------------------|
| Sample size     | The sample size was determined per usual principles in enzymatic data collection, i.e all experiments were performed in six replicates on three independent enzyme preparations. The same does apply to our MD simulations that were performed five times. |
| Data exclusions | No data were excluded                                                                                                                                                                                                                                      |
| Replication     | All attempts at replication were successful                                                                                                                                                                                                                |
| Randomization   | This is not relevant to our study.                                                                                                                                                                                                                         |
| Blinding        | This is not relevant to our study.                                                                                                                                                                                                                         |

## Reporting for specific materials, systems and methods

### Materials & experimental systems

|                                     |                                                           |
|-------------------------------------|-----------------------------------------------------------|
| n/a                                 | Included in the study                                     |
| <input checked="" type="checkbox"/> | <input type="checkbox"/> Unique biological materials      |
| <input checked="" type="checkbox"/> | <input type="checkbox"/> Antibodies                       |
| <input type="checkbox"/>            | <input checked="" type="checkbox"/> Eukaryotic cell lines |
| <input checked="" type="checkbox"/> | <input type="checkbox"/> Palaeontology                    |
| <input checked="" type="checkbox"/> | <input type="checkbox"/> Animals and other organisms      |
| <input checked="" type="checkbox"/> | <input type="checkbox"/> Human research participants      |

### Methods

|                                     |                                                 |
|-------------------------------------|-------------------------------------------------|
| n/a                                 | Included in the study                           |
| <input checked="" type="checkbox"/> | <input type="checkbox"/> ChIP-seq               |
| <input checked="" type="checkbox"/> | <input type="checkbox"/> Flow cytometry         |
| <input checked="" type="checkbox"/> | <input type="checkbox"/> MRI-based neuroimaging |

## Eukaryotic cell lines

Policy information about [cell lines](#)

|                                                                      |                                                                                                     |
|----------------------------------------------------------------------|-----------------------------------------------------------------------------------------------------|
| Cell line source(s)                                                  | Insect cells (sf9) from Thermofisher                                                                |
| Authentication                                                       | Commercial sources                                                                                  |
| Mycoplasma contamination                                             | The cells were not tested.                                                                          |
| Commonly misidentified lines<br>(See <a href="#">ICLAC</a> register) | Name any commonly misidentified cell lines used in the study and provide a rationale for their use. |
